# Supplementary material
Source: PubMed Central journal article supplement (PMC5053399)
Supplement: NIHMS784054-supplement-Graphical_Abstract.pdf [file NIHMS784054-supplement-Graphical_Abstract.pdf]

## Table of Contents Graphic

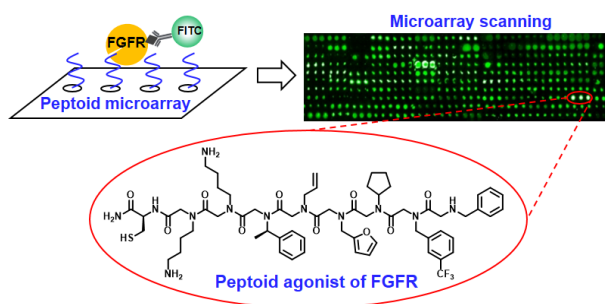

Microarray-based screening leads to the discovery of novel peptoid ligands as potential FGFR agonists.
